# Supplementary material
Source: PubMed Central journal article supplement (PMC9923570)
Supplement: PEDS_20142077SupplementaryData.pdf [file PEDS_20142077SupplementaryData.pdf]

# Supplemental Information

## Clinical Scenarios

### SCENARIO 1

A 9-month-old girl presents with 2 days of fever (temperature, 39.0°C), tachypnea, rhinorrhea, cough, and diffuse wheezing and rhonchi. Her percutaneous oxygen saturation is 89% in room air. CXR reveals a right lower lobe opacity. She is being admitted.

What is your admitting diagnosis?

Which of the following would you do?

|                                |     |    |
|--------------------------------|-----|----|
| Intravenous catheter placement | Yes | No |
| CBC count                      | Yes | No |
| Blood culture                  | Yes | No |
| Antibiotics                    | Yes | No |
| Nasal suctioning               | Yes | No |
| Albuterol (nebulized)          | Yes | No |

### SCENARIO 2

A well-appearing 5-year-old boy presents with 1 day of fever (temperature, 39.0°C), tachypnea, cough, and wheezing. His

percutaneous oxygen saturation is 89% in room air. A CXR performed at the outside hospital reveals a right lower lobe opacity. He is being admitted.

What is your admitting diagnosis?

Which of the following would you do?

|                                |     |    |
|--------------------------------|-----|----|
| Intravenous catheter placement | Yes | No |
| CBC count                      | Yes | No |
| Blood culture                  | Yes | No |
| Antibiotics                    | Yes | No |
| Nasal suctioning               | Yes | No |
| Albuterol (nebulized)          | Yes | No |

### SCENARIO 3

An ill-appearing 7-year-old girl presents with 1 day of fever (temperature, 39.0°C), tachypnea, and cough. Vitals

are as follows: heart rate, 125 beats per minute; respiratory rate, 52; and percutaneous oxygen saturation, 85% on room air. A CXR performed in the ambulatory setting revealed a right lower lobe infiltrate, prompting the primary pediatrician to prescribe amoxicillin. The patient has received 2 doses of amoxicillin but was referred to the ED for worsening tachypnea and vomiting. She is being admitted.

What is your admitting diagnosis?

Which of the following would you do?

|                                |     |    |
|--------------------------------|-----|----|
| Intravenous catheter placement | Yes | No |
| CBC count                      | Yes | No |
| Blood culture                  | Yes | No |
| Antibiotics                    | Yes | No |
| Nasal suctioning               | Yes | No |
| Albuterol (nebulized)          | Yes | No |

1. In a patient with pneumonia, what findings or circumstances would prompt you to obtain a blood culture? (Please check all that apply)

---

Fever  
Admission to hospital  
Discharge to home  
Previous oral antibiotics (before arrival in ED)  
Previous intravenous/intramuscular antibiotics  
Unimmunized/underimmunized  
Hypoxemic  
Age (If so, what age cutoff would you use?)  
Tachycardia alone (adjusted for temperature)  
Tachycardia and hypotension  
CXR with lobar pneumonia  
CXR without lobar pneumonia  
Well-appearing, well-hydrated  
Decision to treat with oral antibiotics in ED  
Decision to treat with intravenous/intramuscular antibiotics in ED  
Clinical bronchiolitis with infiltrate on CXR (atelectasis versus pneumonia)  
Clinical asthma exacerbation with infiltrate on CXR (atelectasis versus pneumonia)

---

2. In a patient with pneumonia, what findings or circumstances would prompt you to not obtain a blood culture?

---

Fever  
Admission to hospital  
Discharge to home  
Previous oral antibiotics (before arrival in ED)  
Previous intravenous/intramuscular antibiotics  
Unimmunized/underimmunized  
Hypoxemic  
Age (If so, what age cutoff would you use?)  
Tachycardia alone (adjusted for temperature)  
Tachycardia and hypotension  
CXR with lobar pneumonia  
CXR without lobar pneumonia  
Well-appearing, well-hydrated  
Decision to treat with oral antibiotics in ED  
Decision to treat with intravenous/intramuscular antibiotics in ED  
Clinical bronchiolitis with infiltrate on CXR (atelectasis versus pneumonia)  
Clinical asthma exacerbation with infiltrate on CXR (atelectasis versus pneumonia)

---
